# Supplementary material
Source: Springer Nature journal article supplement (https://www.springermedizin.de/resource/supplementary/13046_2010_322_MOESM3_ESM.pdf/9662122)

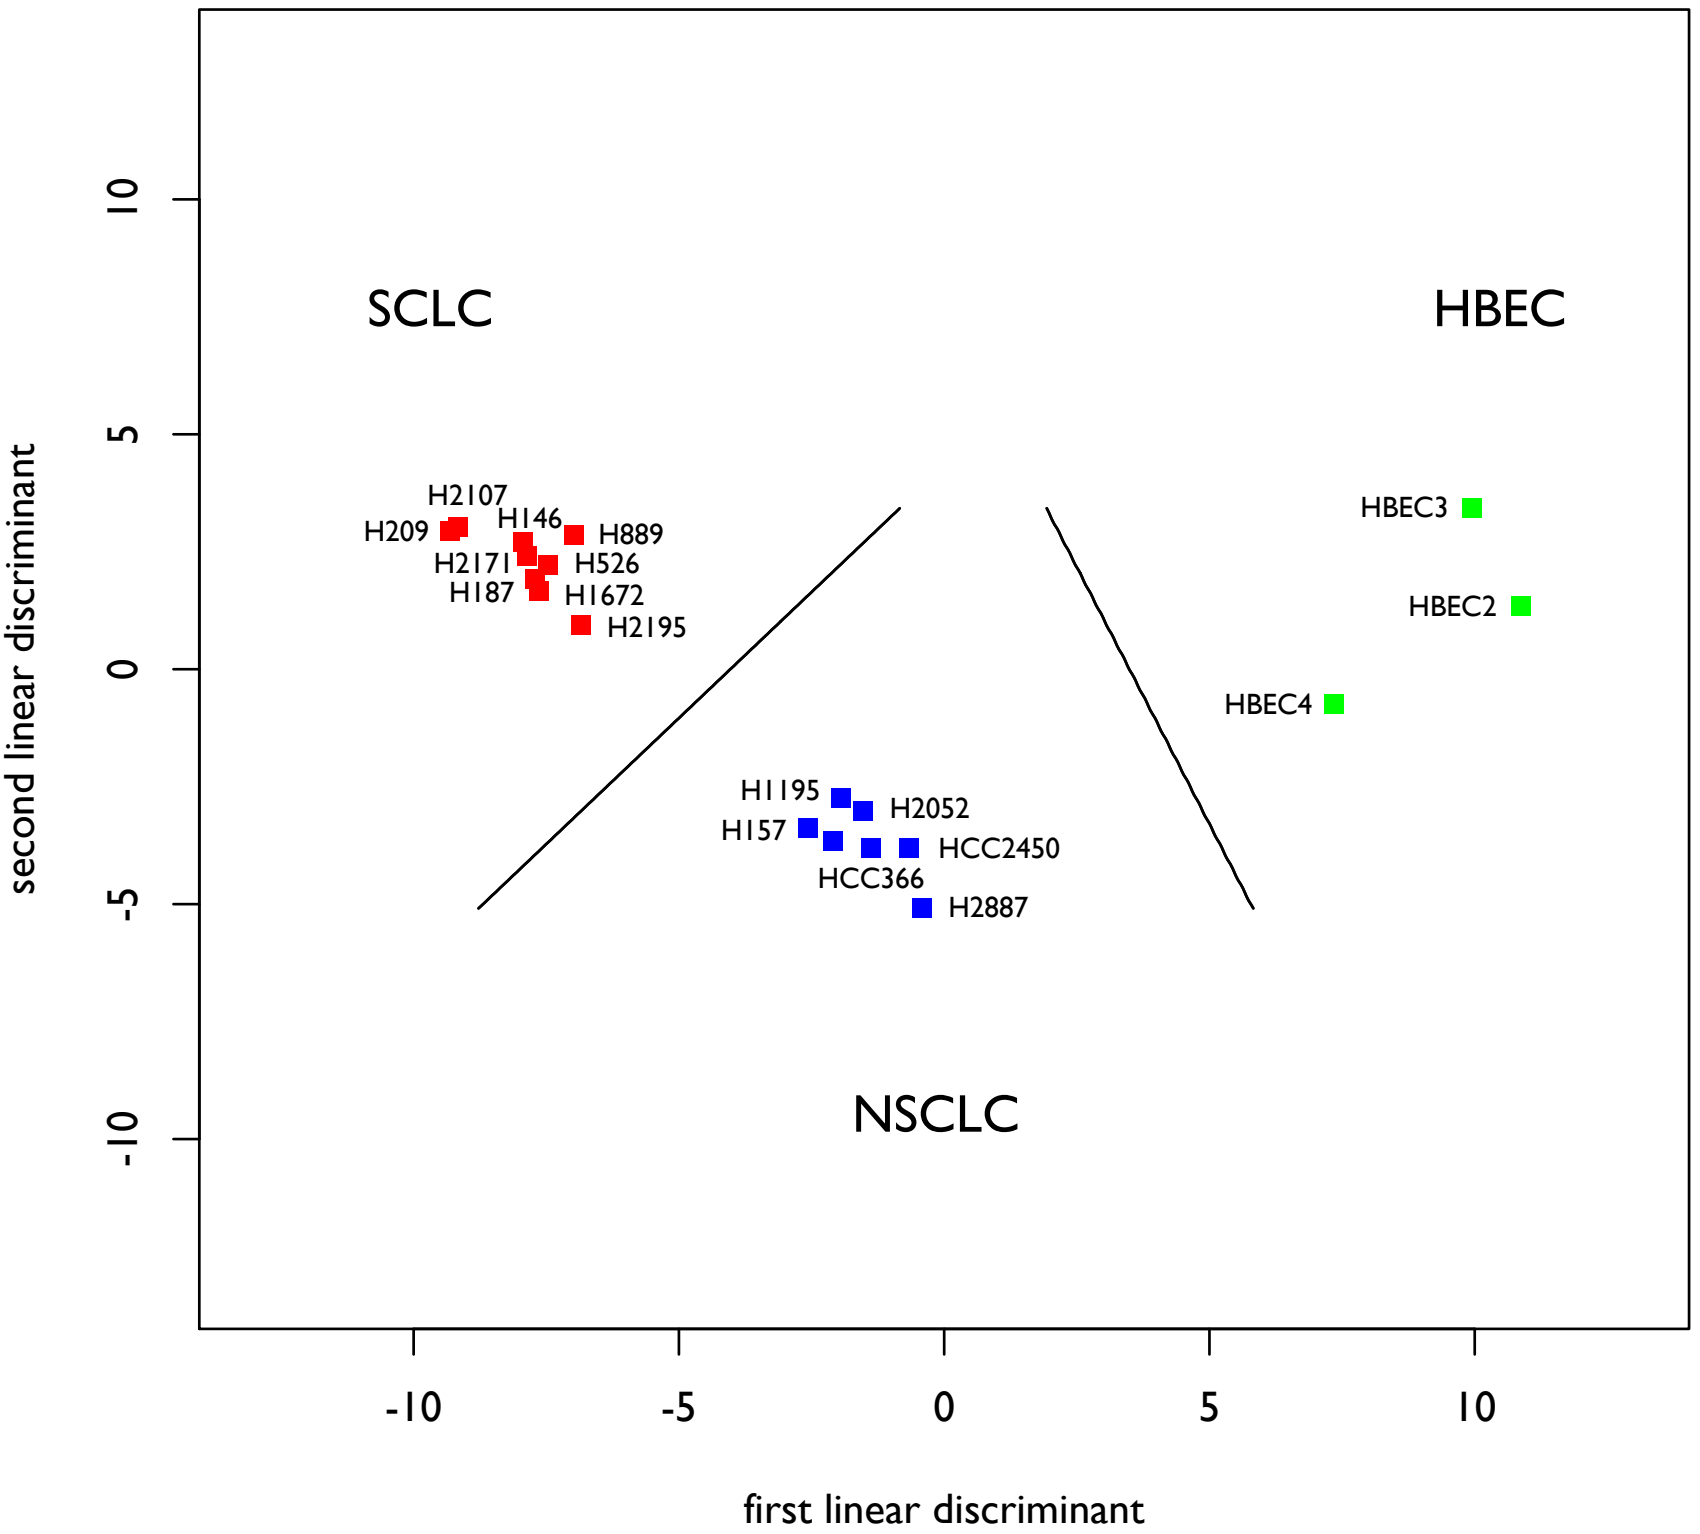

Supplement: MOESM3 [file 9662122]
